# Supplementary material for: Fabrication of CoSe2/FeSe2 heterostructures with a stable solid-electrode interphase film and low surface activation energy for Na-ion batteries
Source: Royal Society of Chemistry journal article supplement (doi:10.1039/d4ta06098a), 2025-01-01
Supplement: d4ta06098a1.pdf [file d4ta06098a1.pdf]

## Supplementary Information

### **Fabrication of CoSe<sub>2</sub>/FeSe<sub>2</sub> heterostructures with stable solid electrolyte interface film and low surface activation energy for Na-ion batteries**

Zhiya Lin <sup>a,c</sup>, Zhilong Wu <sup>b</sup>, Maoxin Yu <sup>b</sup>, Hai Jia <sup>a</sup>, Kaiqiang Zhou <sup>d</sup>, Xiaohui

Huang <sup>b\*</sup> and Shaoming Ying <sup>b\*</sup>

<sup>a</sup> College of Mathematics and Physics, Ningde Normal University, Ningde, 352100, China.

<sup>b</sup> College of New Energy and Materials, Ningde Normal University, Fujian Provincial Key Laboratory of Featured Materials in Biochemical Industry, Ningde 352100, China.

<sup>c</sup> College of Physics and Energy, Fujian Normal University, Fujian Provincial Solar Energy Conversion and Energy Storage Engineering Technology Research Center, Fuzhou, 350117, China.

<sup>d</sup> School of Physics and Information Engineering, Minnan Normal University, Zhangzhou, 363000, China.

\*Corresponding author:

Xiaohui Huang E-mail: 11429721@qq.com

Shaoming Ying E-mail: yingshaoming@126.com

## **1. Experimental**

### **1.1 Synthesis of FeCo-PBA precursor**

The cubic FeCo-PBA precursor were prepared by coprecipitation method. 4 mmol  $K_3[Fe(CN)_6]$  were dissolved in 200 ml DI water to form solution A. In a separate container, dissolve 6 mmol of  $Co(NO_3)_2 \cdot 6H_2O$  and 9 mmol of  $C_6H_5Na_3O_7$  in 200 ml of deionized water to prepare solution B. Slowly pour solution A into solution B while stirring for 10 minutes, then allow the mixture to stand undisturbed for 24 hours. After centrifugation and drying, the resulting purplish-red sample is the cobalt-iron Prussian blue compound (CoFe-PBA).

### **1.2 Synthesis of FeCo-PBA@PDA composites**

100 mg cubic FeCo-PBA were first dispersed into 100 mL tris-buffer solution (PH=8.5) by ultrasonication for 15 min. Then, 60 mg of dopamine hydrochloride was added into the above solution, which was kept stirring for 12 h. The resultant product hexagon FeCo-PBA@PDA was collected through centrifugation and washed several times with absolute ethyl alcohol and deionized water, respectively, and dried at 70 °C overnight.

### **1.3 Synthesis of CoSe<sub>2</sub>/FeSe<sub>2</sub> and YS- CoSe<sub>2</sub>/FeSe<sub>2</sub>@NC composites**

The as-prepared FeCo-PBA or FeCo-PBA@PDA precursors and Se powders with a weight ratio of (1:4) were put in a corundum boat and calcined at 450 °C in Ar atmosphere for 2.5 h. Then the CoSe<sub>2</sub>/FeSe<sub>2</sub> and YS-CoSe<sub>2</sub>/FeSe<sub>2</sub>@NC composites were obtained.

### **1.4 Materials characterization**

The crystalline phase and morphology of the as-prepared FeCo-PBA, CoSe<sub>2</sub>/FeSe<sub>2</sub> and YS-CoSe<sub>2</sub>/FeSe<sub>2</sub>@NC composites was investigated by powder X-ray diffractometry (XRD, BRUKER D8 ADVANCE) with Cu-K $\alpha$  radiation

( $\lambda=0.15406$  nm) and scanning electron microscopy (SEM, SU8010). The microstructure of  $\text{CoSe}_2/\text{FeSe}_2$  and  $\text{YS-CoSe}_2/\text{FeSe}_2@\text{NC}$  composites are further identified by transmission electron microscopy (TEM, TJEOL JEM 2100). The specific surface area and pore volume of the samples were analyzed by Brunauer Emmett-Teller (BET) measurements using a TriStar II 3020 surface area analyzer. The chemical composition and valence states of  $\text{YS-CoSe}_2/\text{FeSe}_2@\text{NC}$  is analysed by X-ray photoelectron spectroscope (XPS ESCALAB 250Xi, Thermo Scientific).

### **1.5 Cell fabrication and characterization**

The sodium storage performance of  $\text{CoSe}_2/\text{FeSe}_2$  and  $\text{YS-CoSe}_2/\text{FeSe}_2@\text{NC}$  are evaluated with CR2025-type coin cells. The  $\text{CoSe}_2/\text{FeSe}_2$  and  $\text{YS-CoSe}_2/\text{FeSe}_2@\text{NC}$  are combined with Super-P (SP) and polyvinylidene fluoride (PVDF) binder in a mass ratio of 7:2:1 in N-methylpyrrolidone (NMP) to create a homogeneous slurry. This slurry is then cast onto copper foil and dried in a vacuum at 110 °C for 12 hours. After drying, electrode discs with a diameter of 12.5 mm are punched out and weighed, resulting in an active material loading density of approximately 1.4 mg/cm<sup>2</sup>. Electrochemical cells are assembled in an argon-filled glove box where the levels of O<sub>2</sub> and H<sub>2</sub>O are maintained below 0.01 ppm. The electrolyte used is 1 M NaPF<sub>6</sub> in diethylene glycol dimethyl ether (DEGDME), with sodium foil serving as both the anode and counter electrode. A Whatman glass microfiber filter (Whatman GF/F) is employed as the separator. Galvanostatic charge/discharge measurements are conducted within a voltage range of 0.01 to 3.0 V using a multichannel battery testing system (LAND CT2001A). Cyclic voltammetry (CV) and electrochemical impedance spectroscopy (EIS) for the prepared anodes are performed using an electrochemical workstation (Metrohm Autolab PGSTAT302N) with a voltage window of 0.01 to 3.0 V. Galvanostatic intermittent titration technique (GITT) measurements were carried

out by applying a constant current of 50 mA g<sup>-1</sup> for 300 s followed by a 900 s relaxation to reach equilibrium.

## 1.6 Computational Method

Density Functional Theory (DFT) calculations were carried out within the framework of the generalized gradient approximation (GGA), utilizing the Perdew-Burke-Ernzerhof (PBE) functional<sup>1</sup>, as implemented in the Vienna Ab Initio Simulation Package (VASP 6.1.2)<sup>2,3</sup>. The interactions between ion cores and valence electrons were treated using the projector augmented-wave (PAW) method<sup>4,5</sup>. A plane-wave cutoff energy of 450 eV was employed to ensure the accuracy of the calculations. Van der Waals interactions were included using Grimme's DFT-D3 method<sup>6,7</sup>, which provides a reliable description of dispersion forces. Self-consistent calculations were performed with a convergence threshold of 10<sup>-5</sup> eV, ensuring high precision.

The equilibrium geometries and lattice constants were optimized with a maximum force tolerance of 0.02 eV Å<sup>-1</sup>, and the Brillouin zone was sampled with a 1×1×1 Gamma-centered grid during structural relaxation. To avoid spurious interactions between periodic images, a vacuum layer of 15 Å was incorporated in the surface calculations. Spin-polarized calculations were also carried out to account for magnetic effects in the system.

The adsorption energy ( $E_{\text{ads}}$ ) was computed using the following expression:

$$E_{\text{ads}} = E(\text{total}) - E(\text{slab}) - E(\text{Na})$$

where  $E(\text{total})$  represents the total energy of the optimized slab with Na adsorbed,  $E(\text{slab})$  is the energy of the relaxed clean slab, and  $E(\text{Na})$  denotes the energy of an isolated Na atom in the gas phase.

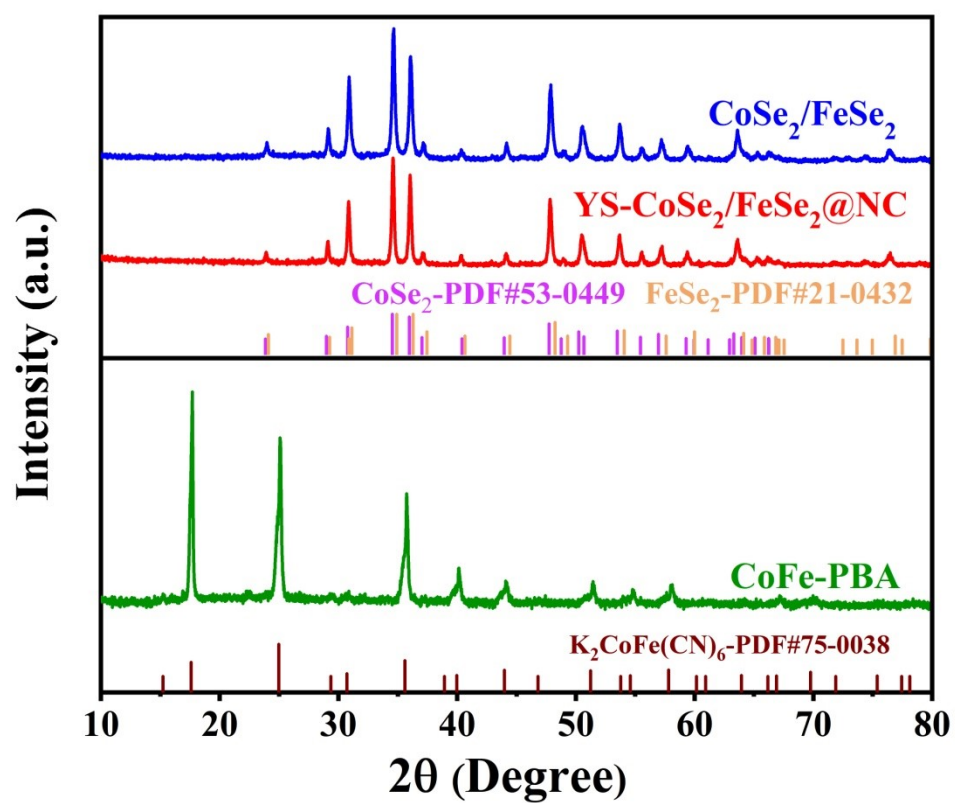

**Figure S1** The XRD curves of CoFe-PBA, CoSe<sub>2</sub>/FeSe<sub>2</sub> and YS-CoSe<sub>2</sub>/FeSe<sub>2</sub>@NC samples.

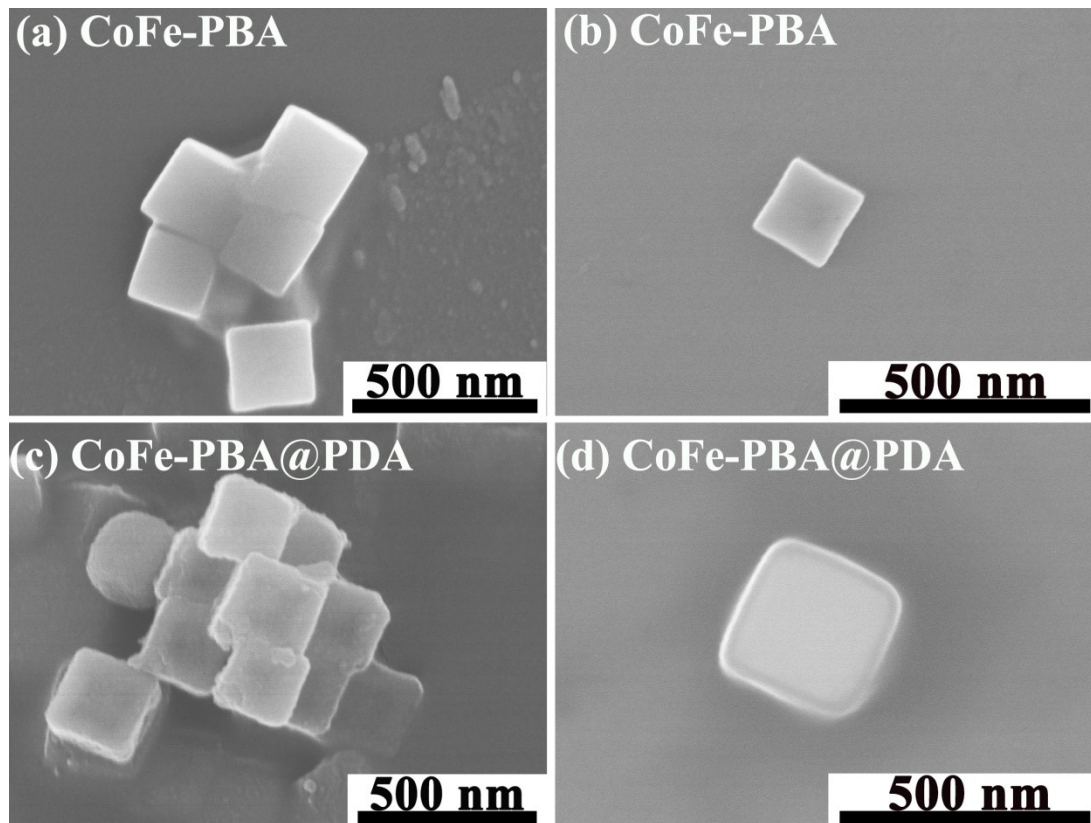

**Figure S2** SEM images of (a,b) CoFe-PBA and (c,d) CoFe-PBA@PDA powders.

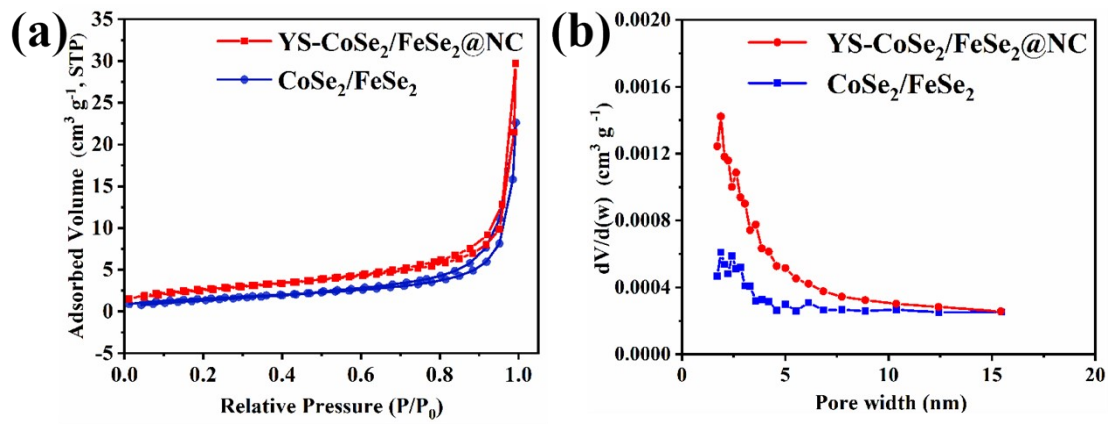

**Figure S3** (a) nitrogen sorption isotherms and (b) pore diameter distribution of CoSe<sub>2</sub>/FeSe<sub>2</sub> and YS-CoSe<sub>2</sub>/FeSe<sub>2</sub>@NC powders.

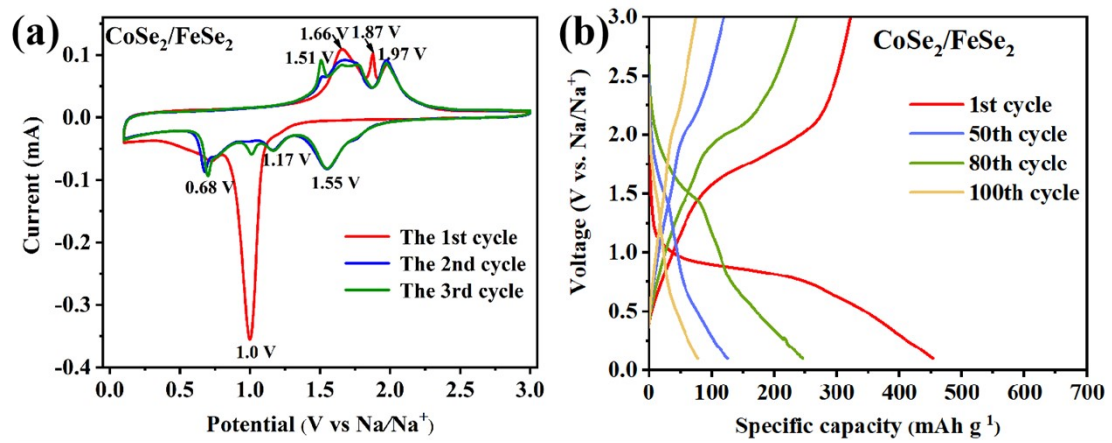

**Figure S4** The (a) CV and (b) galvanostatic charge-discharge curves of  $\text{CoSe}_2/\text{FeSe}_2$ .



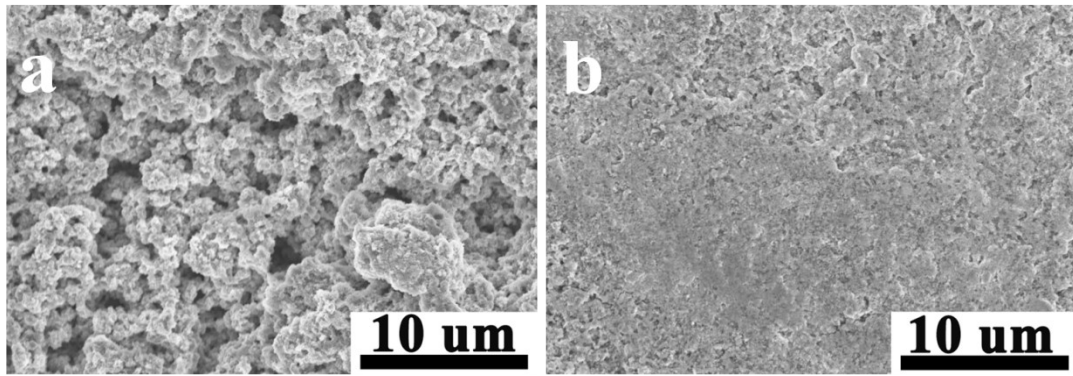

**Figure S5** The surface morphologies of (a)  $\text{CoSe}_2/\text{FeSe}_2$  and (b)  $\text{YS-CoSe}_2/\text{FeSe}_2@\text{NC}$  electrodes after 100 cycles.

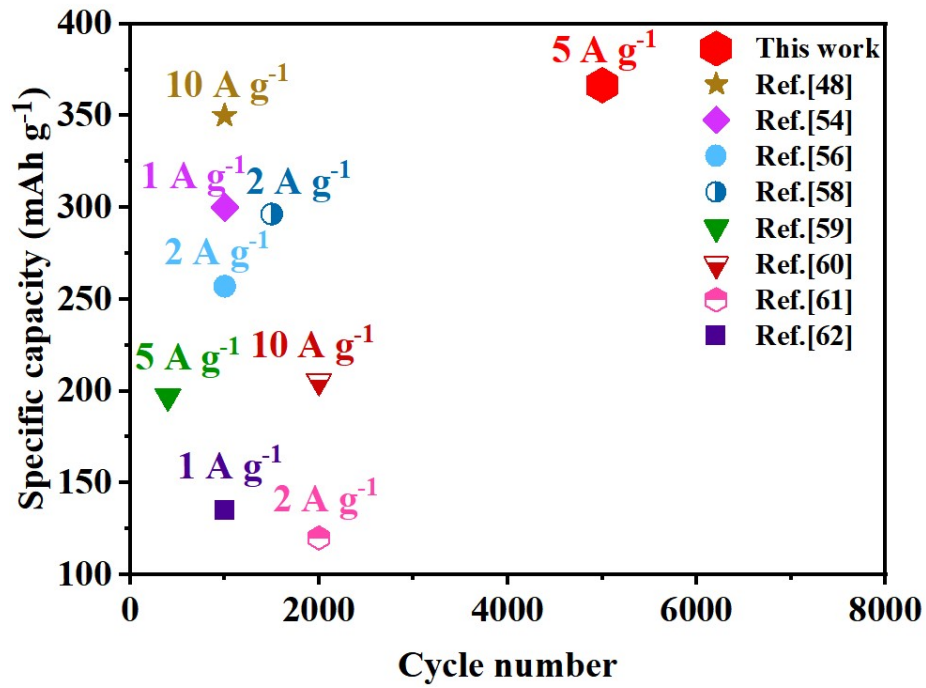

Figure S6 comparison of the cycling capability of the YS- CoSe<sub>2</sub>/FeSe<sub>2</sub>@NC electrode with those of the other heterojunction material.

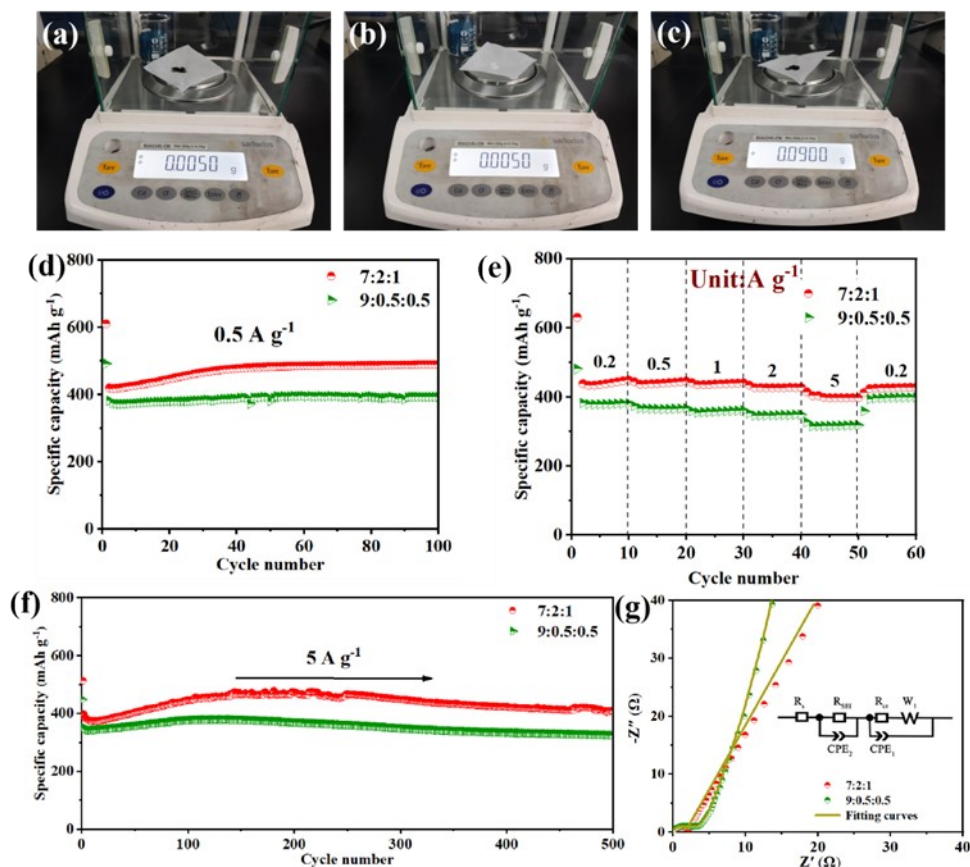

**Fig. S7** (a-c) Record of weighing YS-CoSe<sub>2</sub>/FeSe<sub>2</sub>@NC with Super-P (SP) and polyvinylidene difluoride (PVDF), (d) Cycle performance of 7:2:1 and 9:0.5:0.5 mass ratios electrodes at current density of 0.5 A g<sup>-1</sup>, (e) Rate performance of 7:2:1 and 9:0.5:0.5 mass ratios electrodes at various current density, (f) Long-term cyclic capability of 7:2:1 and 9:0.5:0.5 mass ratios electrodes at 5 A g<sup>-1</sup>. (g) AC impedance spectra of 7:2:1 and 9:0.5:0.5 mass ratios electrodes.

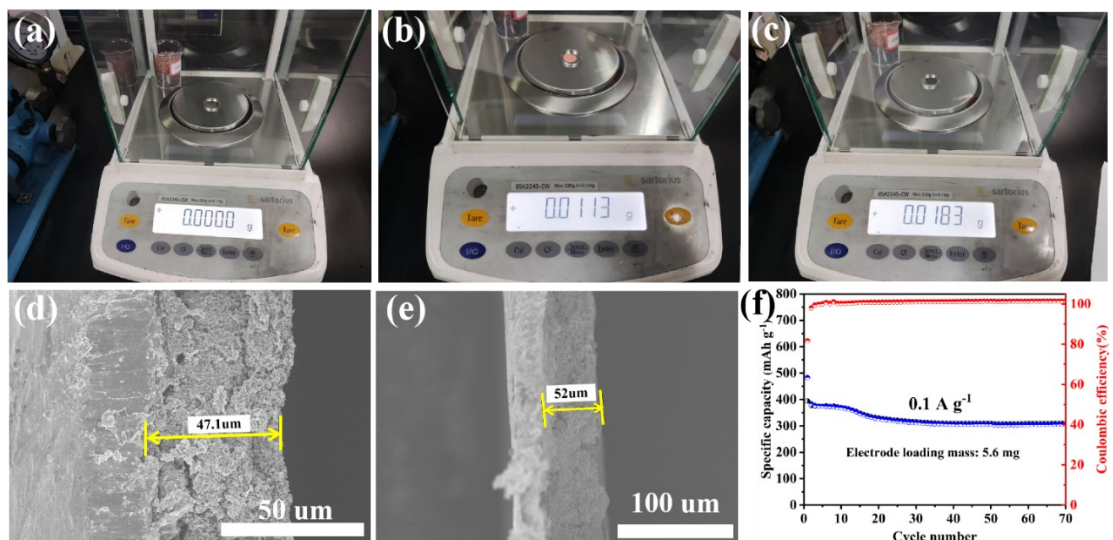

**Fig. S8** (a-c) Record of the process of weighing the electrode discs, (d,e) SEM image of the thickness of electrode discs coating, (f) Cycle performance of YS-CoSe<sub>2</sub>/FeSe<sub>2</sub>@NC electrodes at current density of 0.1 A g<sup>-1</sup>.

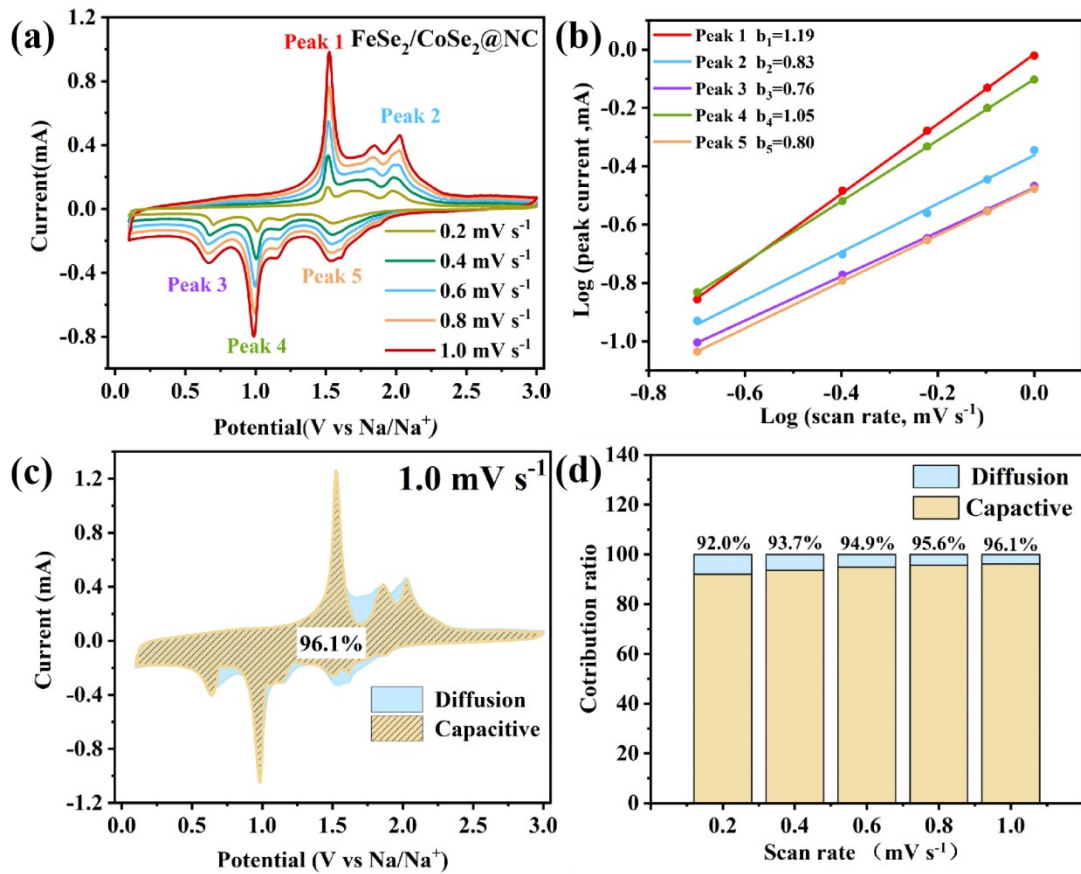

**Figure S9** (a) CV curves of the YS-CoSe<sub>2</sub>/FeSe<sub>2</sub>@NC electrode in Na coin-cell at various scan rates from 0.1 to 1 mV s<sup>-1</sup>; (b) Calculation of b-values by the relationship of the scan rate and peak current; (c) CV curve of the YS-CoSe<sub>2</sub>/FeSe<sub>2</sub>@NC electrode at 1.0 mV s<sup>-1</sup> with separation of capacitive and diffusion currents; (d) Contribution ratio of the capacitive and diffusion controlled capacity at different scan rate.

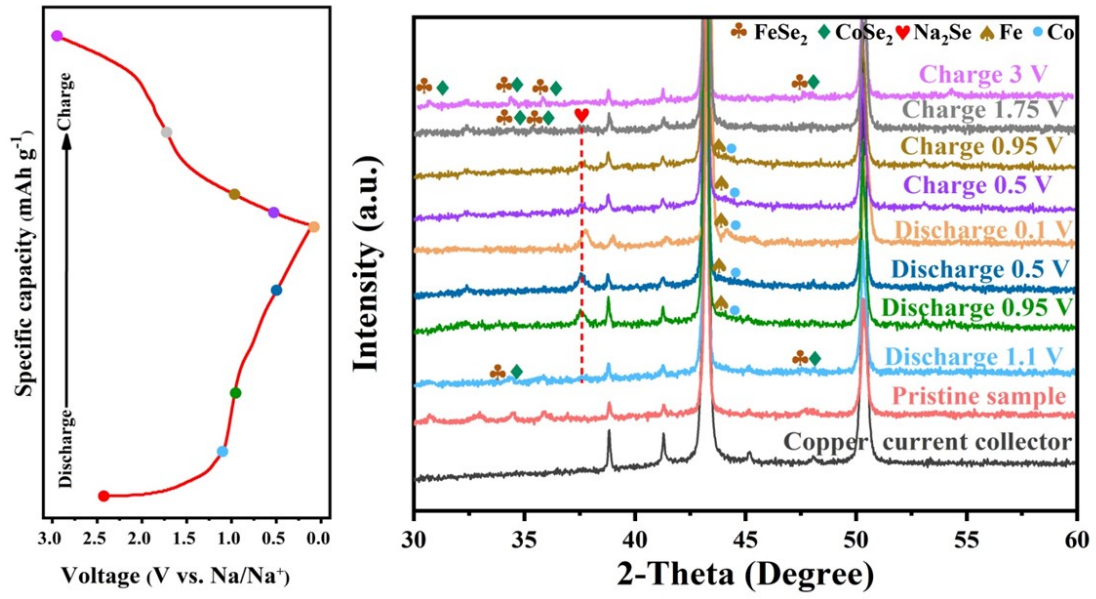

**Figure S10** Ex-situ XRD patterns of YS-CoSe<sub>2</sub>/FeSe<sub>2</sub>@NC electrode collected during the first electrochemical cycle, with the corresponding charge/discharge profiles in SIBs.



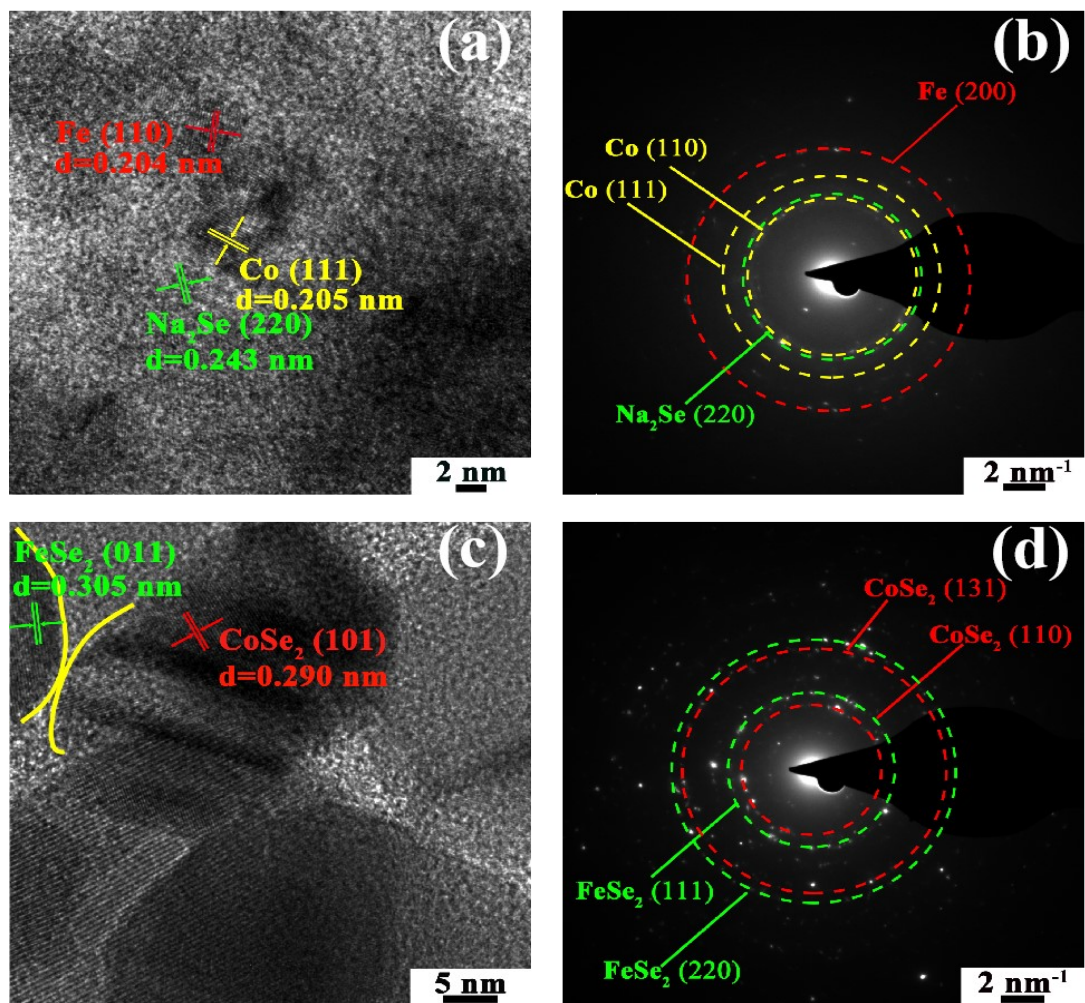

**Figure S11** Ex-situ HRTEM and SAED patterns of YS-CoSe<sub>2</sub>/FeSe<sub>2</sub>@NC (a,b) after first discharge cycle, (c,d) after first charge cycles.

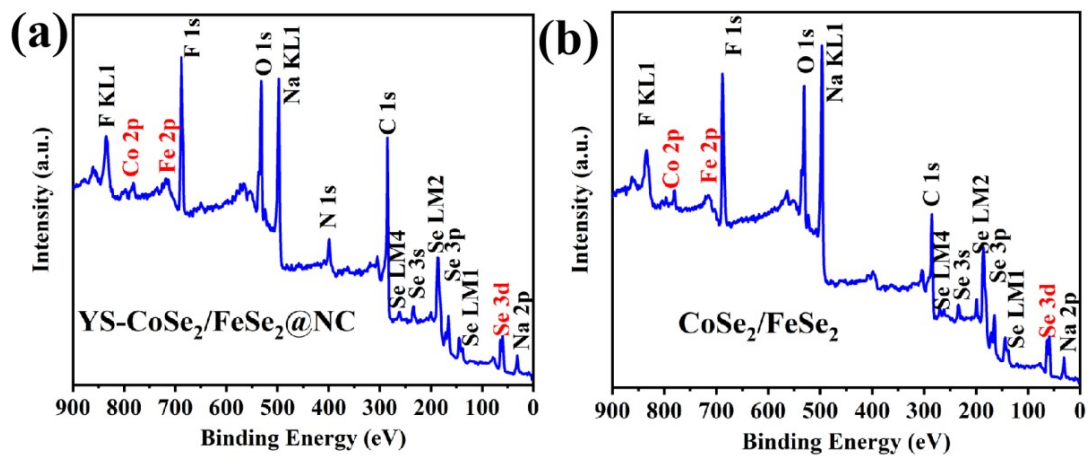

**Figure S12** XPS survey spectra of (a) YS-CoSe<sub>2</sub>/FeSe<sub>2</sub>@NC and (b) CoSe<sub>2</sub>/FeSe<sub>2</sub> extracted from coin cells after first sodiation/de-sodiation.



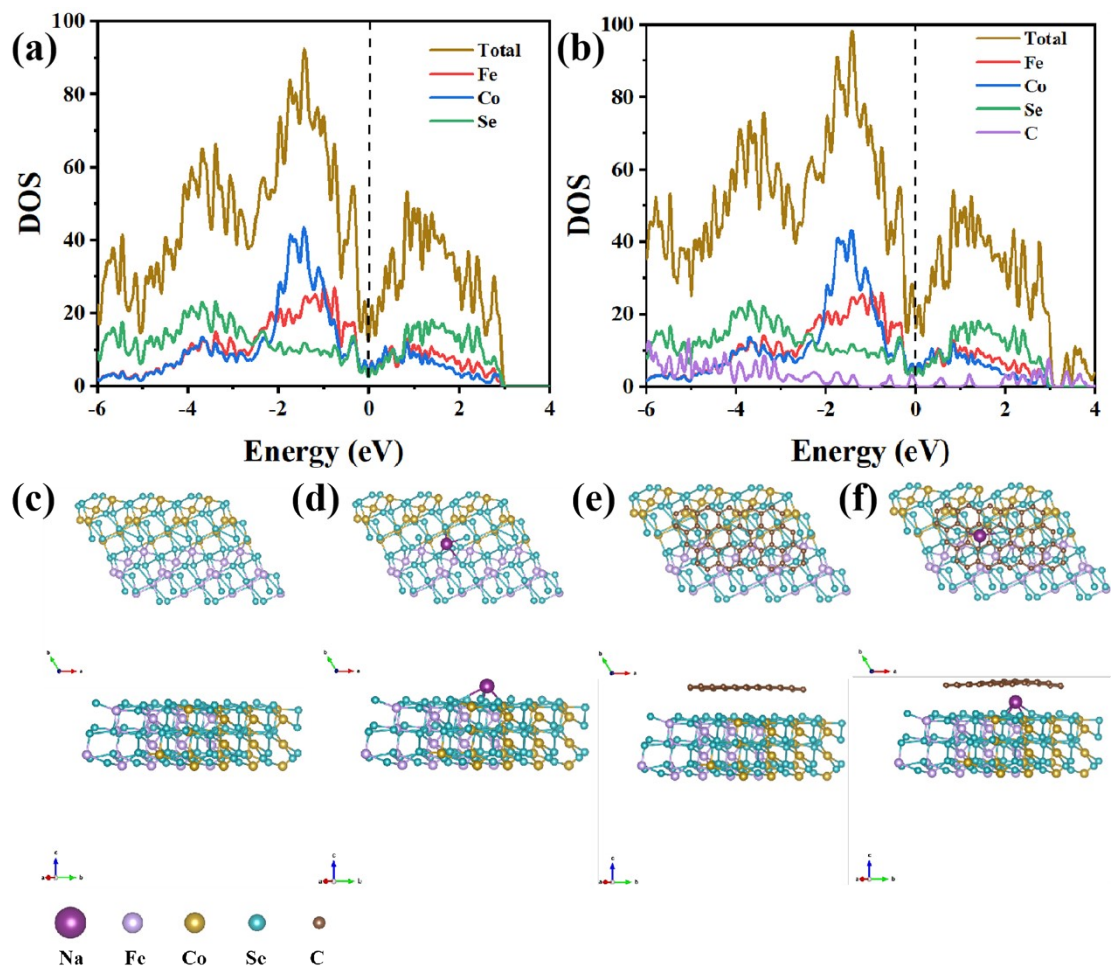

**Figure S13** Projected density of states of (a) CoSe<sub>2</sub>/FeSe<sub>2</sub>, and (b) C- CoSe<sub>2</sub>/FeSe<sub>2</sub>, Top view and side view of (c) CoSe<sub>2</sub>/FeSe<sub>2</sub> (111) and (e) C- CoSe<sub>2</sub>/FeSe<sub>2</sub> (111) configuration, Na adsorption on (d) CoSe<sub>2</sub>/FeSe<sub>2</sub> (111) and (f) C- CoSe<sub>2</sub>/FeSe<sub>2</sub> (111), The spheres with different colors denote C, Se, Co, Fe and Na atoms, respectively.

Table S1. The adsorption energies ( $E_{ad}$ ) of Na on  $\text{CoSe}_2/\text{FeSe}_2$  (111) and C-  $\text{CoSe}_2/\text{FeSe}_2$  (111).

| Compounds                        | $E_{ad}$ (eV) |
|----------------------------------|---------------|
| $\text{CoSe}_2/\text{FeSe}_2$    | -2.69         |
| C- $\text{CoSe}_2/\text{FeSe}_2$ | -2.75         |

## References

1. J. P. Perdew, K. Burke, M. Ernzerhof, *Phys. Rev. Lett.* 1996, 77, 3865-3868.
2. W. Kohn and L. J. Sham, *Phys. Rev.*, 1965, 140, A1133-A1138.
3. P. Raybaud, J. Hafner, G. Kresse, S. Kasztelan and H. Toulhoat, *J. Catal.*, 2000, 189, 129-146.
4. G. Kresse, D. Joubert, *Phys. Rev. B* 1999, 59, 1758-1775.
5. P. E. Blöchl, *Phys. Rev. B* 1994, 50, 17953-17979.
6. S. Grimme, J. Antony, S. Ehrlich and H. Krieg, *J. Chem. Phys.*, 2010, 132, 154104.
7. S. Grimme, S. Ehrlich and L. Goerigk, *J. Comput. Chem.*, 2011, 32, 1456-1465.
